# Supplementary material
Source: publisher figshare collection journal article supplement (https://aacr.figshare.com/articles/dataset/_/22730658)
Supplement: Supplementary file 1 [file 40384893]

**The supplementary data includes:**

**Supplementary Figs. S1 to S6**

**Supplementary Tables S1 to S5 (provided as separate excel files)**

# Supplementary Fig. S1

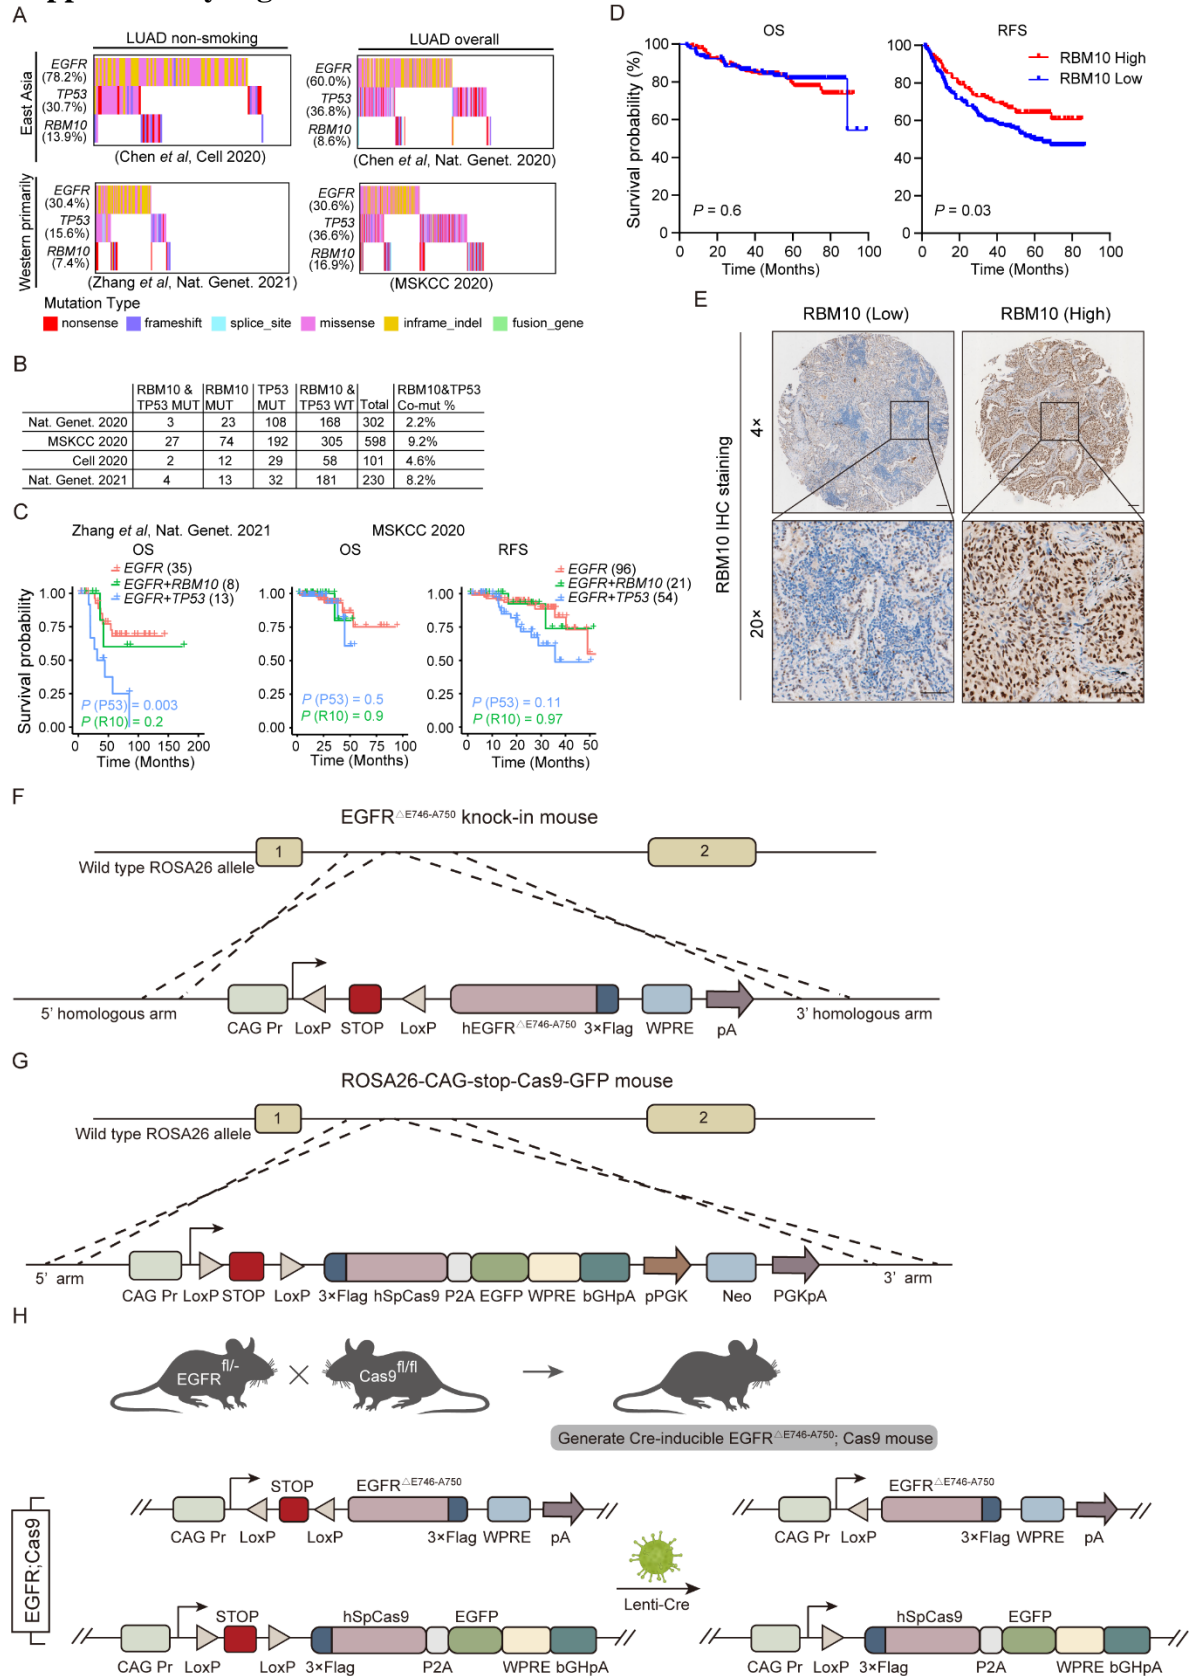

**Supplementary Figure S1. Mutational spectrum of *EGFR*, *RBM10*, and *TP53* and their correlations with patient survival in lung adenocarcinoma (LUAD), and the construction of *EGFR* knock-in and *EGFR*; Cas9 mouse model.** (A) Spectrum and (B) data table for *EGFR*, *RBM10*, and *TP53* mutations in different LUAD datasets. The percentage of *RBM10* and *TP53* mutation co-occurrence were shown in data table. (C, D) Overall survival (OS) and recurrence free survival (RFS) curve of LUAD patients stratified by *EGFR*, *RBM10*, and *TP53* mutations from the indicated cohorts (C) and by *RBM10* expression estimated by immunohistochemistry (IHC) of LUAD tissue microarray (TMA) (D). Number of patients was indicated in parenthesis in (C). *P* values were calculated by log-rank tests. (E) Representative images of *RBM10* immunohistochemistry analysis of TMA LUAD samples, with high or low immunoreactive score (IRS) of *RBM10*. Scale bar: 100 $\mu$ m for 4 $\times$ magnification, and 50 $\mu$ m for 20 $\times$ magnification. (F-H) Schematic illustration of the generation of *EGFR* $\Delta^{E746-A750}$  knock-in and *EGFR*; Cas9 mouse model.

**Supplementary Fig. S2.**

**A**

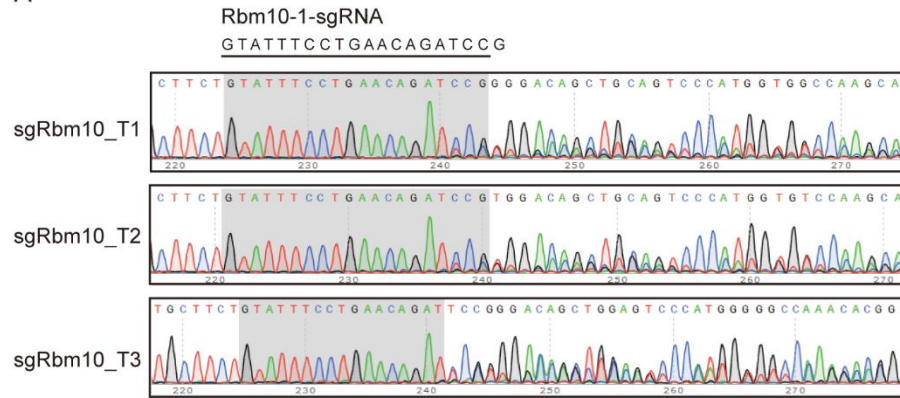

**B**

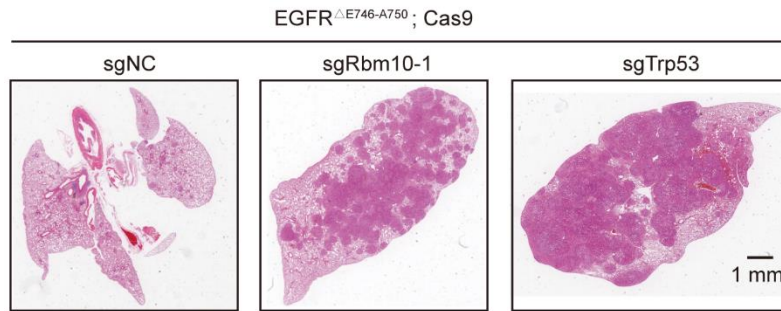

**C**

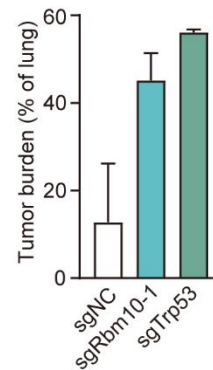

**D**

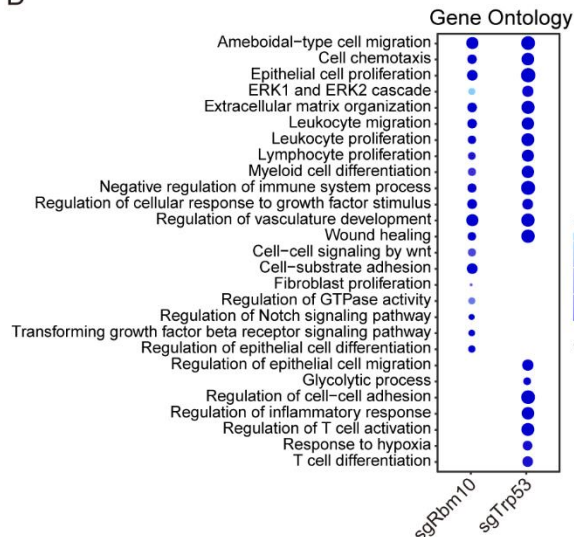

**E**

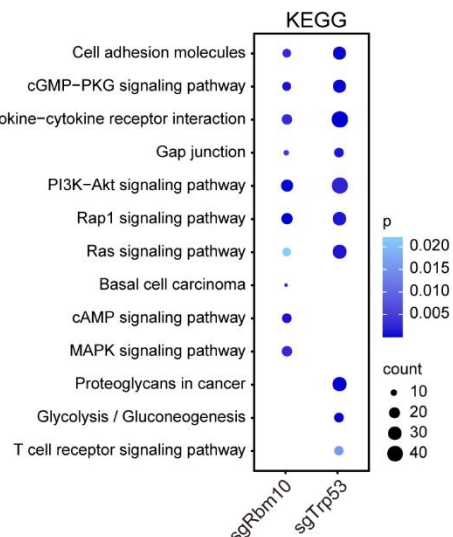

**Supplementary Figure S2. sgRNA-mediated *Rbm10* depletion promotes *EGFR*-driven lung tumor development.** (A) sgRNA-mediated *Rbm10* knockout efficiency confirmed by Sanger sequencing of DNA fragments from mice tumors. (B, C) Hematoxylin and eosin (H&E) staining of tumor sections in sgNC, sgRbm10 and sgTrp53 mice. n = 2 biological replicates. Error bars represent + SEM. (D, E) Dot plot illustration of GO (gene ontology) and KEGG (Kyoto Encyclopedia of Genes and Genomes) enrichment analysis of DEGs indicated in Fig. 2A.

### Supplementary Fig. S3.

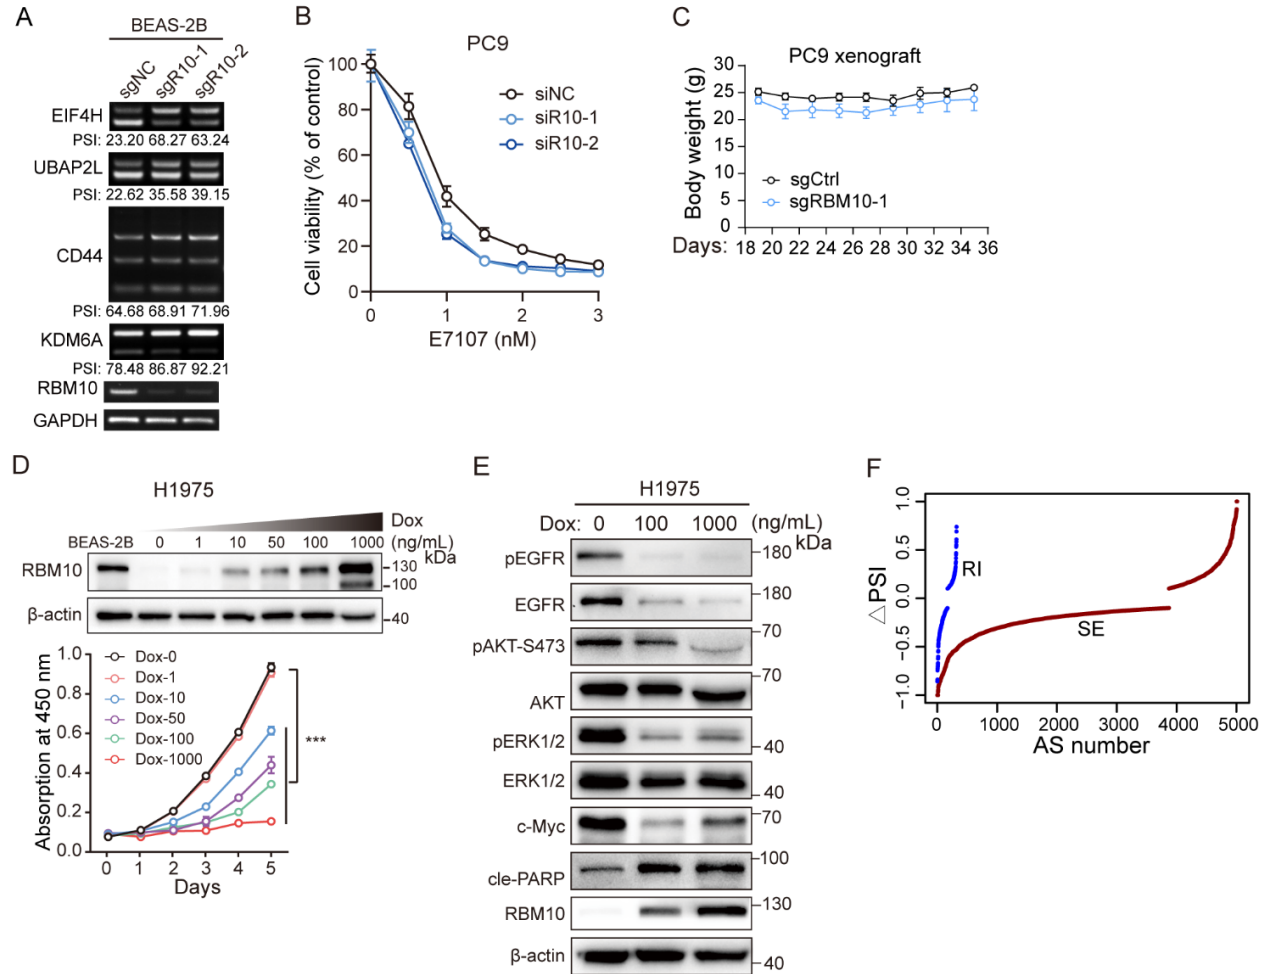

**Supplementary Figure S3. Impacts of RBM10 expression on target splicing, response to spliceosome inhibitor and the growth of LUAD cells.** (A) Confirmation of the splicing changes following *RBM10* knockout using two independent single guide RNAs in BEAS-2B cells. Relative expression of *RBM10* was shown. Loading control: GAPDH. (B) Dose-response curves of *RBM10* wild type PC9 LUAD cells treated with E7107 under control and *RBM10* silencing (siNC and siRBM10) conditions, respectively. n = 4 biological replicates. (C) Body weight of nude mice upon E7107 treatment, as indicated in Fig. 4D-F. (D) Cell growth of *RBM10*-deficient H1975 LUAD cells upon increasing amount of *RBM10* re-expression. Dox: Doxycycline. (E) Western blot analysis of phosphorylated and total EGFR, AKT, and ERK as well as c-Myc and apoptotic marker protein expression in H1975 cells following *RBM10* re-expression. Loading control:  $\beta$ -actin. (F) Alternative splicing (AS) changes of PC9 cells treated with Pladienolide B. Cutoff:  $|\Delta\text{PSI} \text{ (percent-spliced-in)}| \geq 0.1$ ,  $P$  value < 0.05. SE: skipped exon, RI: retained intron. Error bars represent  $\pm$ SD in (D),  $\pm$ SEM in (B, C). \*\*\*  $P < 0.001$ , ns: not significant, two-way ANOVA followed by Bonferroni's tests in (D).

### Supplementary Fig. S4.

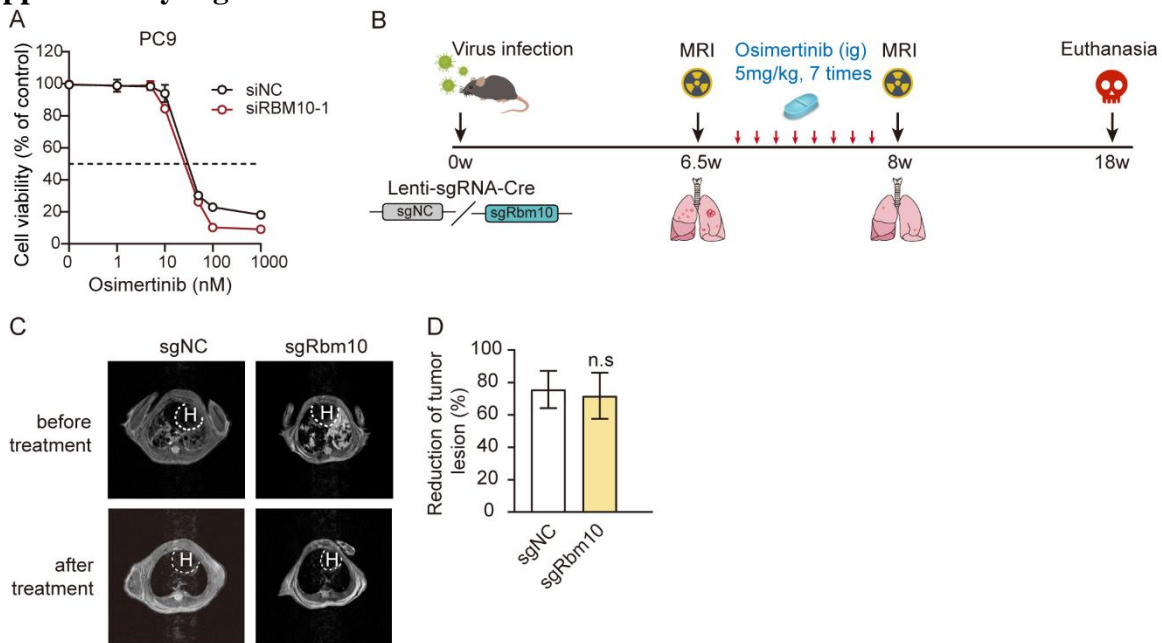

**Supplementary Figure S4. Effects of *RBM10* depletion on the efficacy of osimertinib in *EGFR*-mutant LUAD cells and mice tumors.** (A) Dose response curves of osimertinib in *RBM10*-silenced and control PC9 LUAD cells.  $n = 4$  technical replicates, error bars represent  $\pm$ SD. (B) Experimental scheme of osimertinib treatment in *EGFR*; Cas9 mouse that were infected with lenti-sgNC-Cre or lenti-sgRbm10-Cre. (C, D) Magnetic Resonance Imaging (MRI) detection and quantification of mice tumors before and after osimertinib treatment. H: heart.  $n = 3, 4$  respectively, error bars represent  $\pm$ SEM. ns: not significant, Student's *t*-test.

## Supplementary Fig. S5.

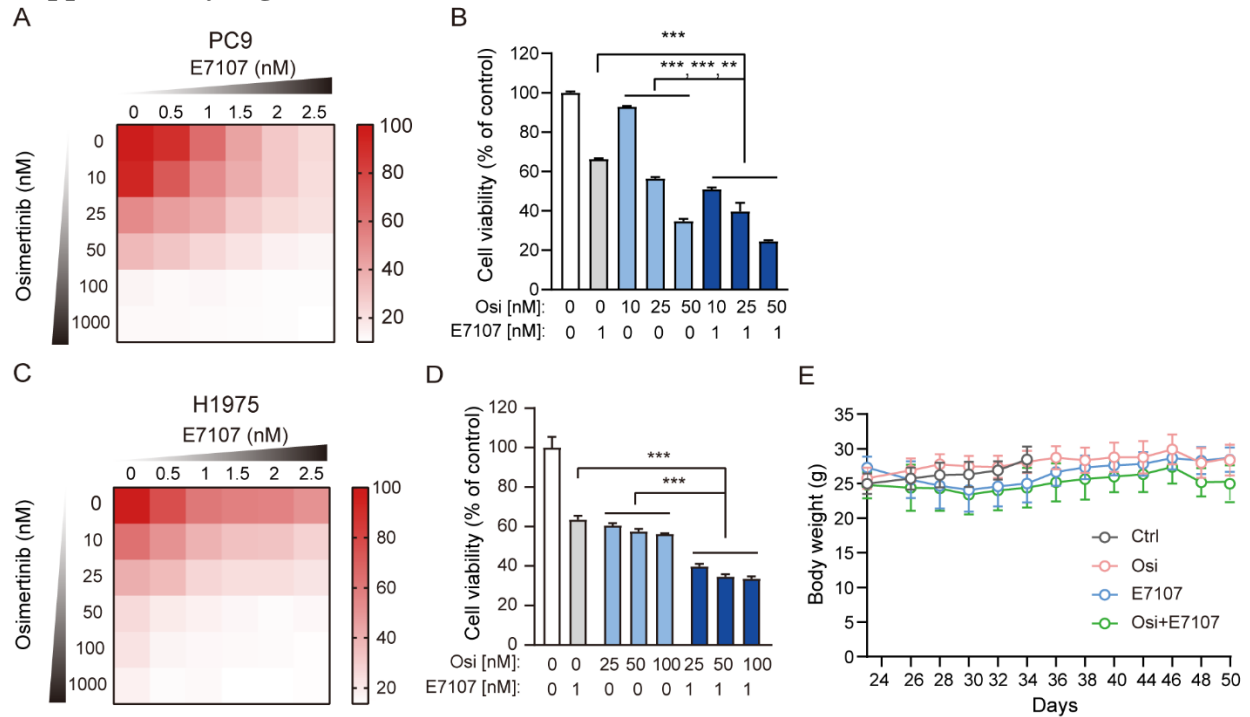

**Supplementary Figure S5. *RBM10* deficiency elevates the sensitivity of spliceosome inhibitor in *EGFR*-mutant LUAD cells.** (A) Heatmap representation and (B) bar graphs of the growth of PC9 cells treated with Osi and E7107 individually or in combination.  $n = 4$  technical replicates. (C) Heatmap representation and (D) bar graphs of the growth of H1975 cells treated with Osi and E7107 individually or in combination.  $n = 4$  technical replicates. (E) Mice body weight post drug treatment as indicated in Fig. 5K.  $n = 5, 6, 6, 6$  biological replicates, respectively. Error bars represent  $\pm$ SD or  $\pm$ SEM in (B, D),  $\pm$ SEM in (E). \*\*  $P < 0.01$ , \*\*\*  $P < 0.001$ , one-way ANOVA followed by Dunnett's tests.

## Supplementary Fig. S6.

A

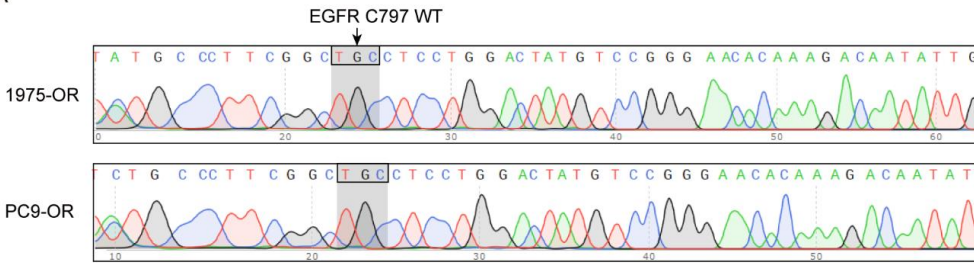

B

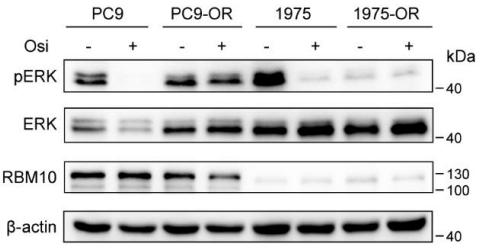

C

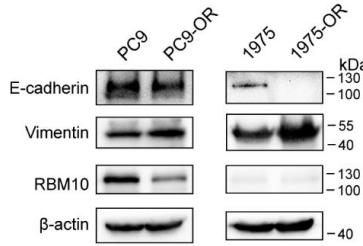

D

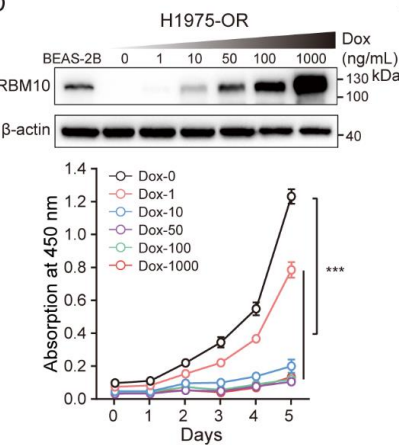

E

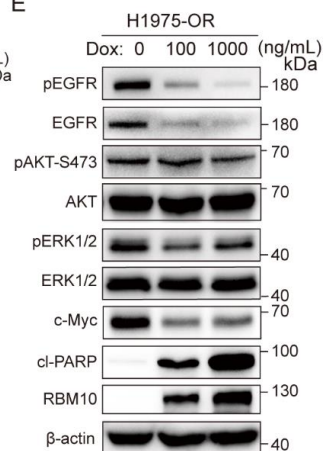

F

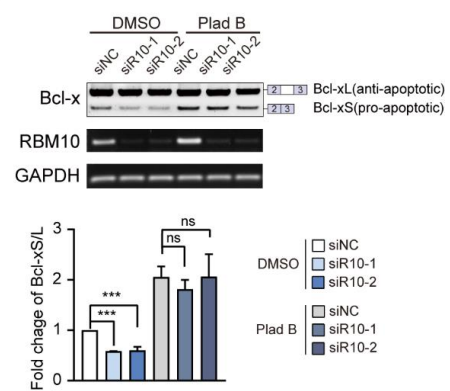

**Supplementary Figure S6. Characterization of LUAD cell lines with acquired resistance to osimertinib (PC9-OR and H1975-OR), and splicing changes of Bcl-x induced by RBM10 knockdown in the absence or presence of Plad B treatment in PC9 cells. (A)** Sanger sequencing confirms that PC9-OR and H1975-OR do not contain *EGFR* C797 mutation. **(B, C)** Western blot analysis of the bypassing activation of ERK signaling pathway downstream of EGFR **(B)** and marker proteins of epithelial to mesenchymal transition (EMT) **(C)** in PC9-OR and H1975-OR cells. Osimertinib (Osi) added in PC9 and H1975 was 100nM and 1 $\mu$ M, respectively. **(D)** Cell growth of H1975-OR cells following RBM10 re-expression. n = 5 technical replicates. **(E)** Western blot analysis of phosphorylated and total EGFR, AKT, and ERK as well as c-Myc and apoptotic marker proteins under indicated conditions. Loading control:  $\beta$ -actin. **(F)** Splicing changes of Bcl-x in *RBM10*-silenced and control PC9 cells without and with Plad B treatment. PSI: percent-spliced-in. Relative expression of *RBM10* was shown. Loading control: GAPDH. Error bars represent  $\pm$ SD in **(D)**, +SEM in **(F)**. \*\*\*  $P < 0.001$ , ns: not significant, two-way ANOVA followed by Bonferroni's tests in **(D)**, one-way ANOVA followed by Dunnett's tests were used in **(F)**.



**Supplementary Tables S1 to S5 (provided as separate excel files)**

**Supplementary Table S1.** Primer and oligonucleotide sequences.

**Supplementary Table S2.** Gene expression changes induced by *Rbm10* or *Trp53* knockout in mice tumors.

**Supplementary Table S3.** Splicing changes induced by *Rbm10* knockout in mice tumors.

**Supplementary Table S4.** Splicing changes associated with *RBM10* loss-of-function mutations in *EGFR*-mutant LUAD samples.

**Supplementary Table S5.** Splicing changes that are drastically altered by Plad B treatment in *RBM10*-silenced as opposed to control LUAD cells.
